# Supplementary material
Source: publisher figshare collection journal article supplement (https://springernature.figshare.com/ndownloader/files/14208350)
Supplement: Supplementary file [file 14208350]

Cases with 10+ visits,  
304.\* ICD-9 code,  
20+ years old  
n=11,573

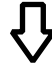

Controls with 10+ visits,  
No addiction ICD-9 codes,  
20+ years old  
n=828,062

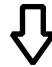

Labs/vitals for cases + controls,  
outlier removal  
Cases: 9,520; Controls: 707,015

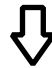

Optional removal of sparse patients, labs,  
and vitals  
Non-sparse Cases: 7,797

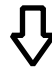

Case-control matching (1:10) with  
replacement by age, gender, race, HIV,  
hepatitis C, sickle-cell status using kNN
